# Supplementary material
Source: PubMed Central journal article supplement (PMC7390064)

Supplemental information for:

## **Increasing chloride in US rivers and its link to potential corrosivity of source waters**

Stets, E.G.<sup>1</sup>, C. J. Lee<sup>2</sup>, D.A. Lytle<sup>3</sup>, M.D. Schock<sup>3</sup>

### Contents:

Figure S1. Map of U.S. displaying regions used in status assessment.

Table S1. Numbers of stations in the trend and status analyses by land use categories and regions.

Figure S2. Map of U.S. displaying trend results for chloride concentration.

Figure S3. Map of U.S. displaying trend results for chloride-sulfate mass ratio (CSMR).

Figure S4. Map of U.S. displaying trend results for Larson Ratio (LR).

Figure S5. Plots showing change in sulfate and alkalinity plotted against changes (1992-2012) in chloride-sulfate mass ratio (CSMR) and Larson ratio (LR).

Table S2. Results of Wilcoxon rank sum test for differences in chloride concentration (mg / L), CSMR, and LR between 1992 and 2012 for sites based on land use categories.

Table S3. Results of Kruskal-Wallis non-parametric ANOVA and Dunn's post-hoc pairwise multiple comparison test among sites included in the status assessment.

Figure S6. Plot of the number of reported Pb ALEs per 10 upstream surface drinking water intakes on the y-axis versus (A) chloride concentration (mg/L); and, (B) Larson ratio on the x-axis.

Figure S1. Map of U.S. displaying regions used in status assessment.

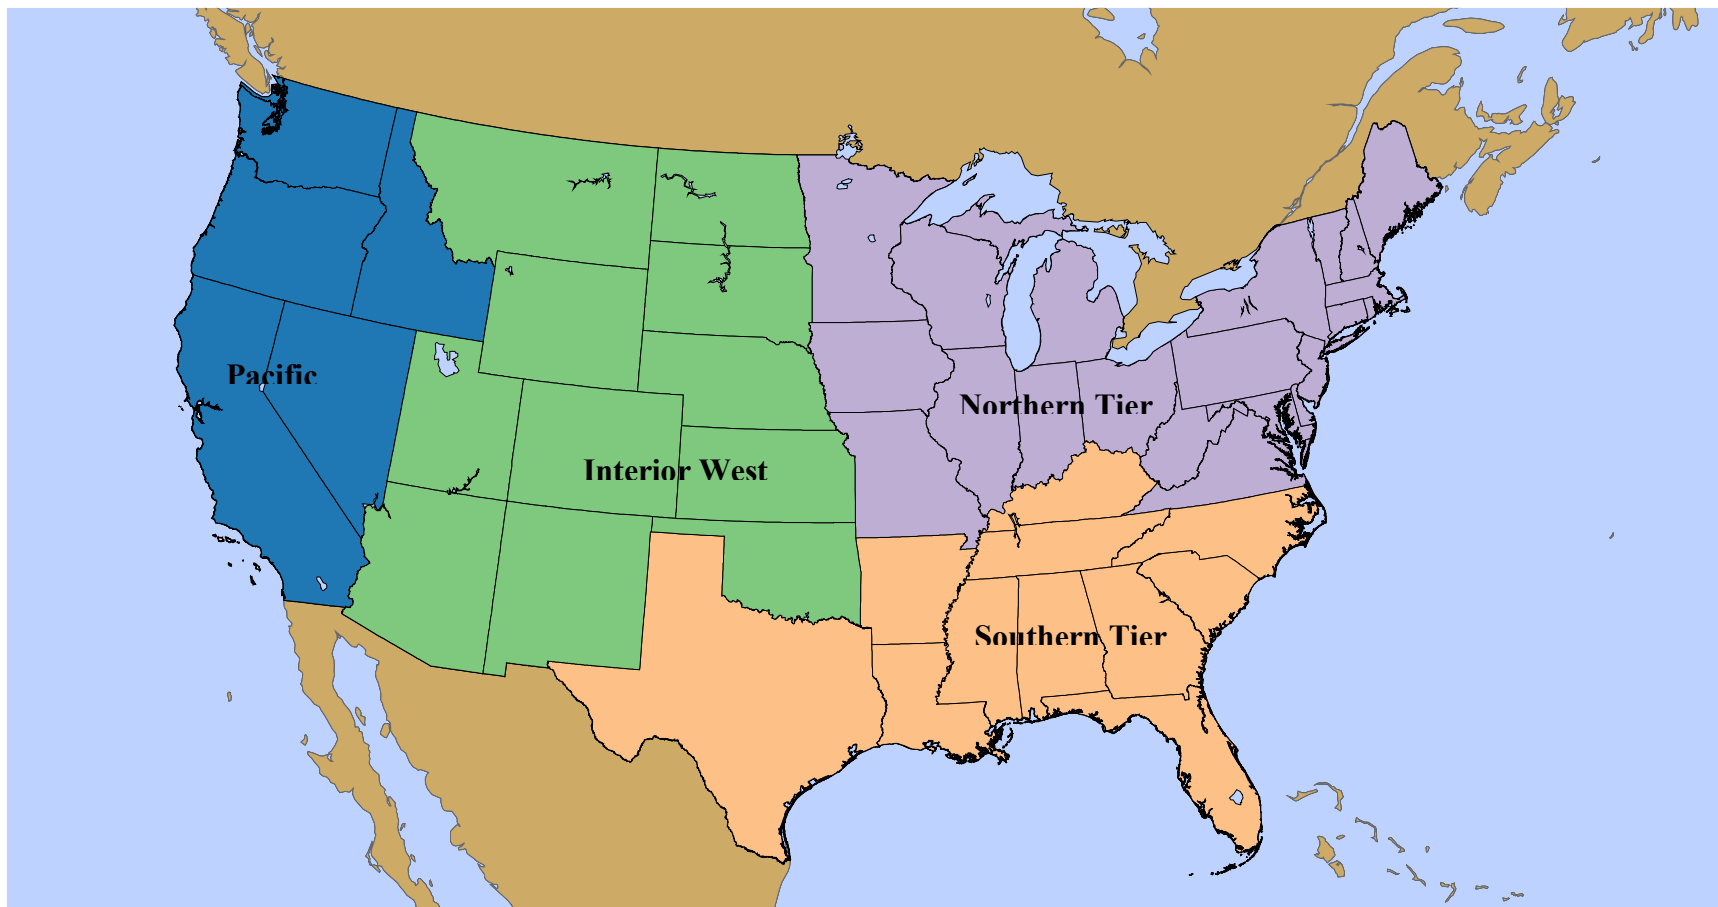

Table S1. Numbers of stations in the trend and status analyses by land use categories and regions.

**UPDATED 08/15/2017**

| Land use category | Status assessment |      |     | Trend analysis |      |    |
|-------------------|-------------------|------|-----|----------------|------|----|
|                   | Chloride          | CSMR | LR  | Chloride       | CSMR | LR |
| All sites         | 323               | 248  | 104 | 152            | 74   | 76 |
| Undeveloped       | 156               | 141  | 27  | 36             | 25   | 26 |
| Agricultural      | 52                | 33   | 20  | 27             | 8    | 8  |
| Mixed             | 84                | 57   | 39  | 66             | 31   | 32 |
| Urban             | 28                | 17   | 17  | 12             | 10   | 10 |
|                   |                   |      |     |                |      |    |
| Region            | Chloride          | CSMR | LR  | Chloride       | CSMR | LR |
| Northern tier     | 148               | 107  | 47  | NA             | NA   | NA |
| Southern tier     | 43                | 37   | 30  | NA             | NA   | NA |
| Interior West     | 92                | 87   | 14  | NA             | NA   | NA |
| Pacific           | 40                | 17   | 12  | NA             | NA   | NA |

NA – Not analyzed.

Figure S2. Map of U.S. displaying trend results for chloride concentration.

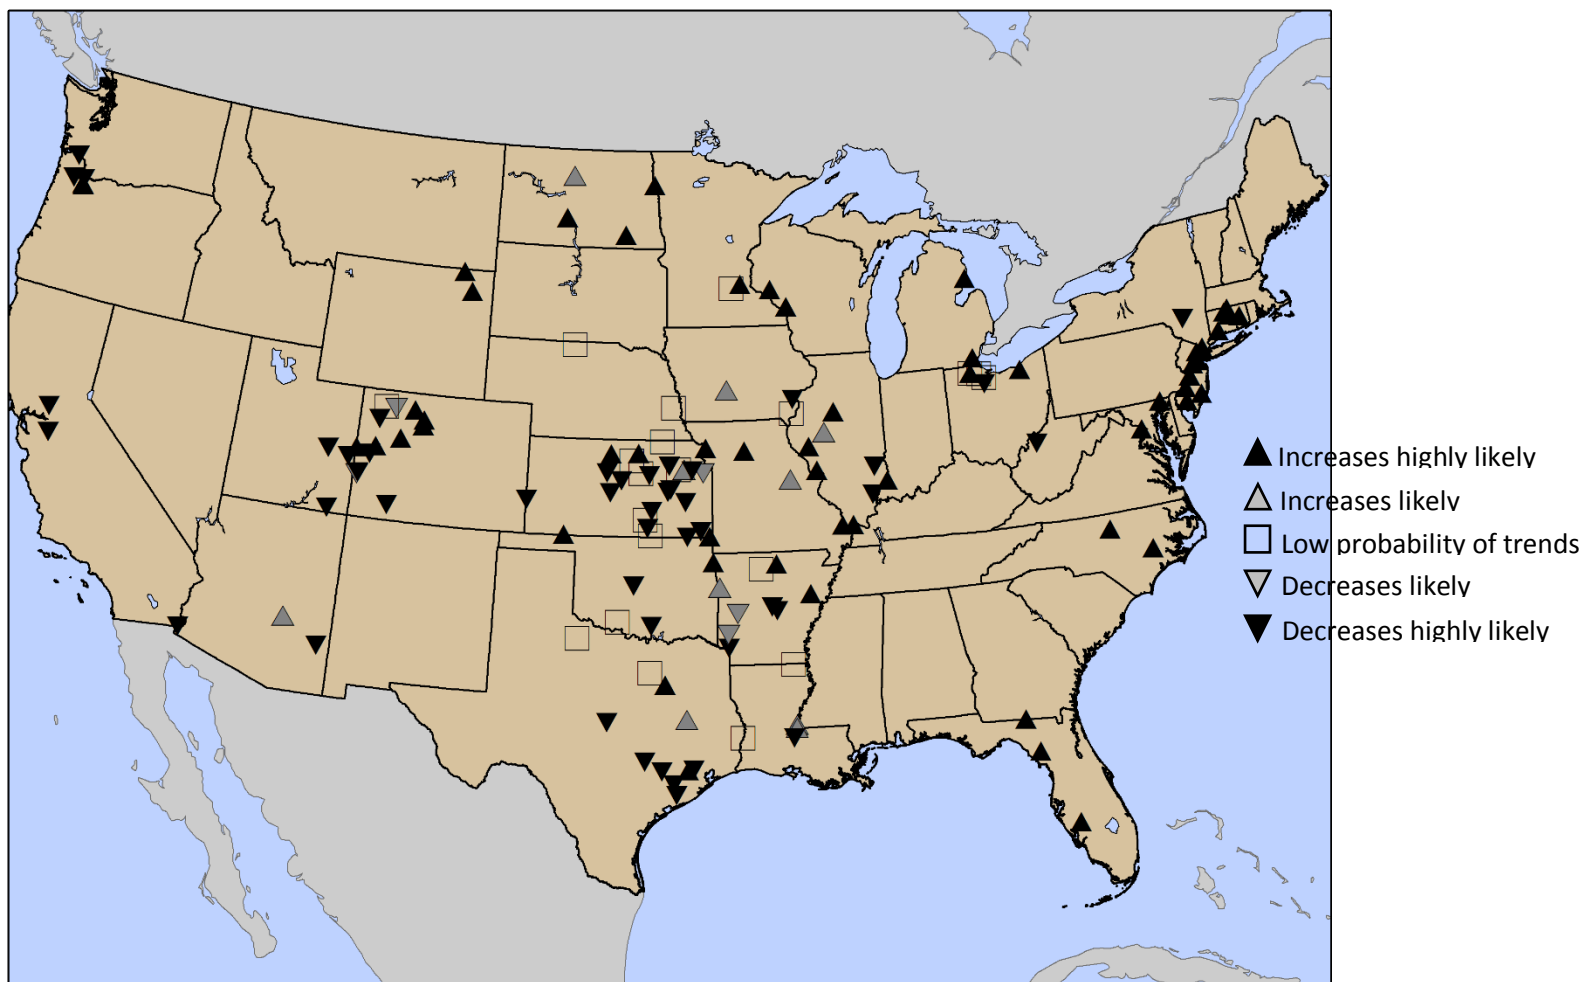

Figure S3. Map of U.S. displaying trend results for chloride-sulfate mass ratio (CSMR).

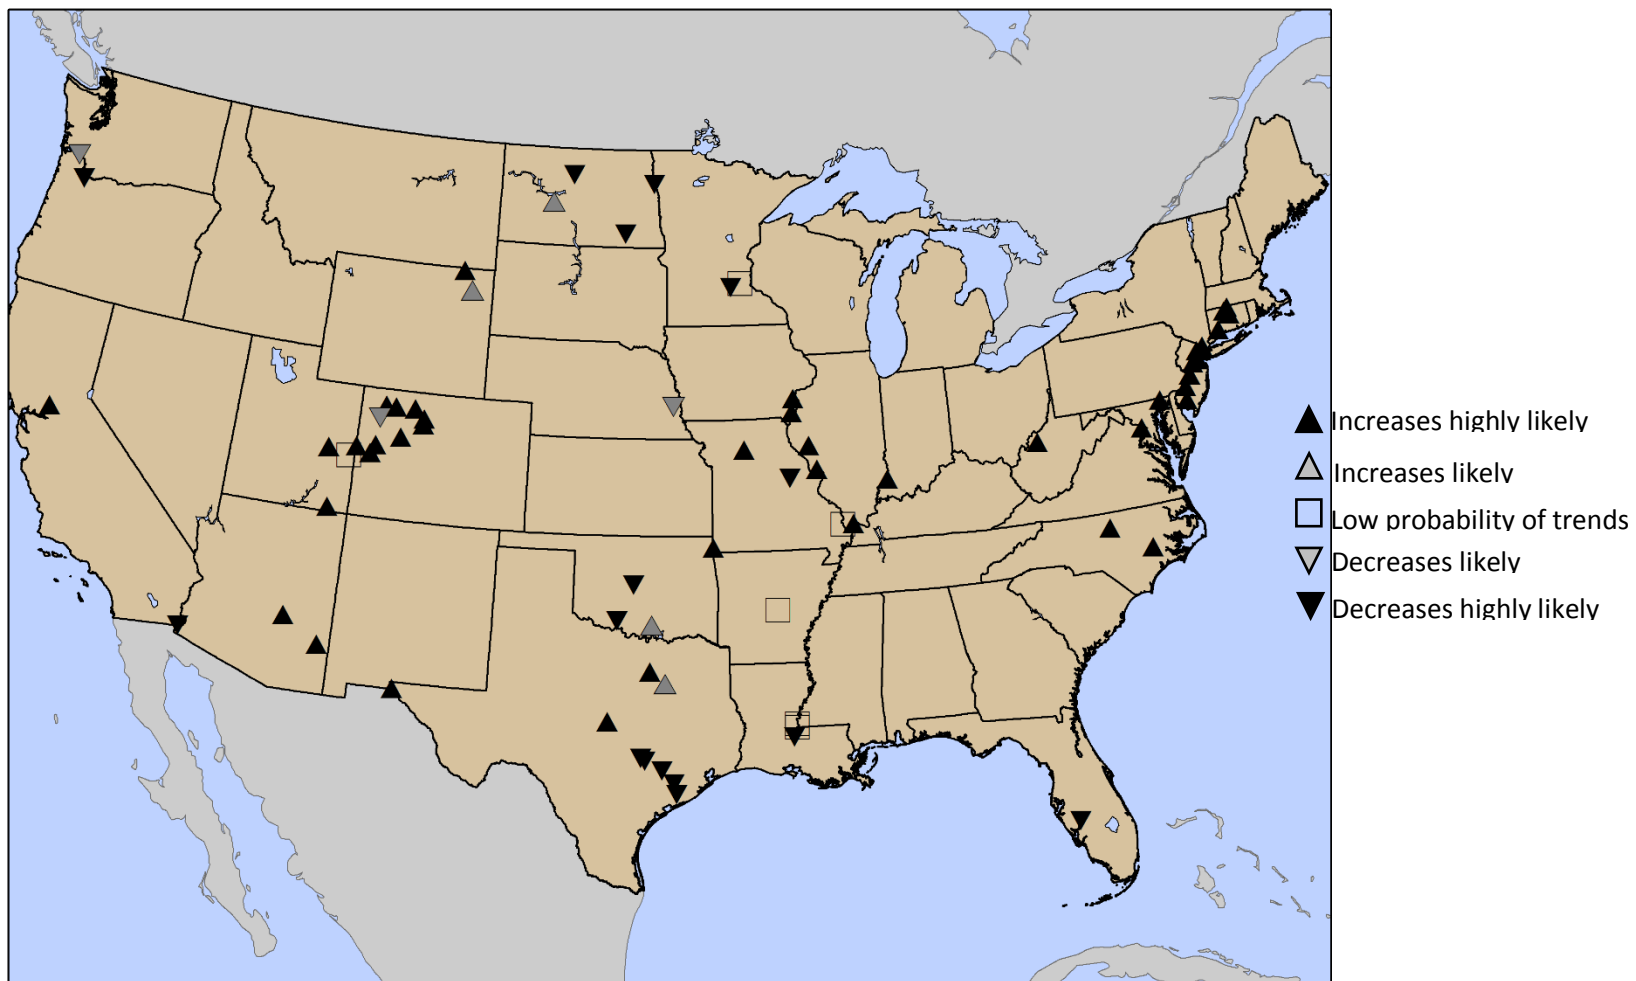





**Table S2.** Results of Wilcoxon rank sum test on raw chloride concentration, CSMR, and LR from 1991-1993 versus 2011-2012 by land-use categories. The median values from each time period are displayed along with the Wilcoxon test statistics (*W*) and the associated *P*-value. Test results with *P* < 0.01 are shown in bold. **Red numbers have not been updated 08/15/2017**

| Parameter | Land-use     | Season      | 1991-1993   | 2011-2012   | <i>W</i>     | <i>P</i> -value  |
|-----------|--------------|-------------|-------------|-------------|--------------|------------------|
| Chloride  | Undeveloped  | Cold        | 40          | 46          | 3339         | 0.18             |
|           |              | Warm        | 79          | 99          | 5842         | 0.90             |
|           | Mixed        | Cold        | 25          | 21          | 3679         | 0.36             |
|           |              | Warm        | 23          | 22          | 39587        | 0.79             |
|           | Agricultural | Cold        | 39          | 41          | 1400         | 0.66             |
|           |              | Warm        | 27          | 28          | 2137         | 0.21             |
|           | Urban        | <b>Cold</b> | <b>87</b>   | <b>144</b>  | <b>48</b>    | <b>0.005</b>     |
|           |              | Warm        | 49          | 56          | 1251         | 0.17             |
| CSMR      | Undeveloped  | Cold        | 0.17        | 0.15        | 2421         | 0.56             |
|           |              | Warm        | 0.52        | 0.49        | 5721         | 0.02             |
|           | Mixed        | <b>Cold</b> | <b>0.88</b> | <b>1.81</b> | <b>639</b>   | <b>0.001</b>     |
|           |              | <b>Warm</b> | <b>0.64</b> | <b>0.71</b> | <b>16593</b> | <b>0.004</b>     |
|           | Agricultural | Cold        | 0.53        | 0.82        | 313          | 0.07             |
|           |              | <b>Warm</b> | <b>0.47</b> | <b>0.84</b> | <b>267</b>   | <b>0.01</b>      |
|           | Urban        | <b>Cold</b> | <b>2.9</b>  | <b>6.0</b>  | <b>28</b>    | <b>&lt;0.001</b> |
|           |              | <b>Warm</b> | <b>1.6</b>  | <b>2.2</b>  | <b>689</b>   | <b>&lt;0.001</b> |
| LR        | Undeveloped  | <b>Cold</b> | <b>1.9</b>  | <b>2.5</b>  | <b>2039</b>  | <b>0.006</b>     |
|           |              | <b>Warm</b> | <b>1.9</b>  | <b>3.0</b>  | <b>4309</b>  | <b>0.01</b>      |
|           | Mixed        | Cold        | 1.00        | 1.03        | 1126         | 0.44             |
|           |              | Warm        | 0.82        | 0.86        | 16902        | 0.08             |
|           | Agricultural | Cold        | 0.48        | 0.50        | 356          | 0.26             |
|           |              | Warm        | 0.48        | 0.55        | 324          | 0.11             |
|           | Urban        | <b>Cold</b> | <b>2.19</b> | <b>4.96</b> | <b>50</b>    | <b>0.005</b>     |
|           |              | <b>Warm</b> | <b>1.58</b> | <b>1.92</b> | <b>844</b>   | <b>&lt;0.001</b> |



Table S3. Results of Kruskal-Wallis non-parametric ANOVA and Dunn’s post-hoc pairwise multiple comparison test among sites included in the status assessment. Comparisons were performed on site-averaged chloride concentration, chloride-sulfate mass ratio (CSMR), and Larson ratio (LR). The  $\chi^2$ , degrees of freedom (df) and  $p$ -values are displayed for the Kruskal-Wallis test along with the Z scores and  $p$  values of the pairwise Dunn’s test.

|                          | Chloride                        | CSMR                            | LR                              |
|--------------------------|---------------------------------|---------------------------------|---------------------------------|
| Kruskal-Wallis           | $\chi^2 = 73, df = 3, p < 0.01$ | $\chi^2 = 75, df = 3, p < 0.01$ | $\chi^2 = 28, df = 3, p < 0.01$ |
| Agricultural-Mixed       | 0.04                            | -1.89**                         | -4.62***                        |
| Agricultural-Undeveloped | 5.28***                         | 3.03***                         | -3.71***                        |
| Agricultural-Urban       | -1.96**                         | -3.90***                        | -4.70***                        |
| Mixed-Undeveloped        | 6.20***                         | 6.37***                         | 0.71                            |
| Mixed-Urban              | -2.13**                         | -2.71***                        | -0.95                           |
| Undeveloped-Urban        | -6.36***                        | -6.82***                        | -1.47*                          |

\* –  $p < 0.1$

\*\* –  $p < 0.05$

\*\*\* –  $p < 0.01$

Figure S5. Comparisons of the changes (1992-2012) in flow-normalized sulfate and alkalinity concentration compared to changes (1992-2012) in the chloride-sulfate mass ratio (CSMR) and the Larson ratio. Grey dots show results for individual sites and boxes show median changes by land use category. A) Change in sulfate versus change in Larson ratio. B) Change in CSMR versus change in sulfate. C) Change in Larson ratio versus change in alkalinity.

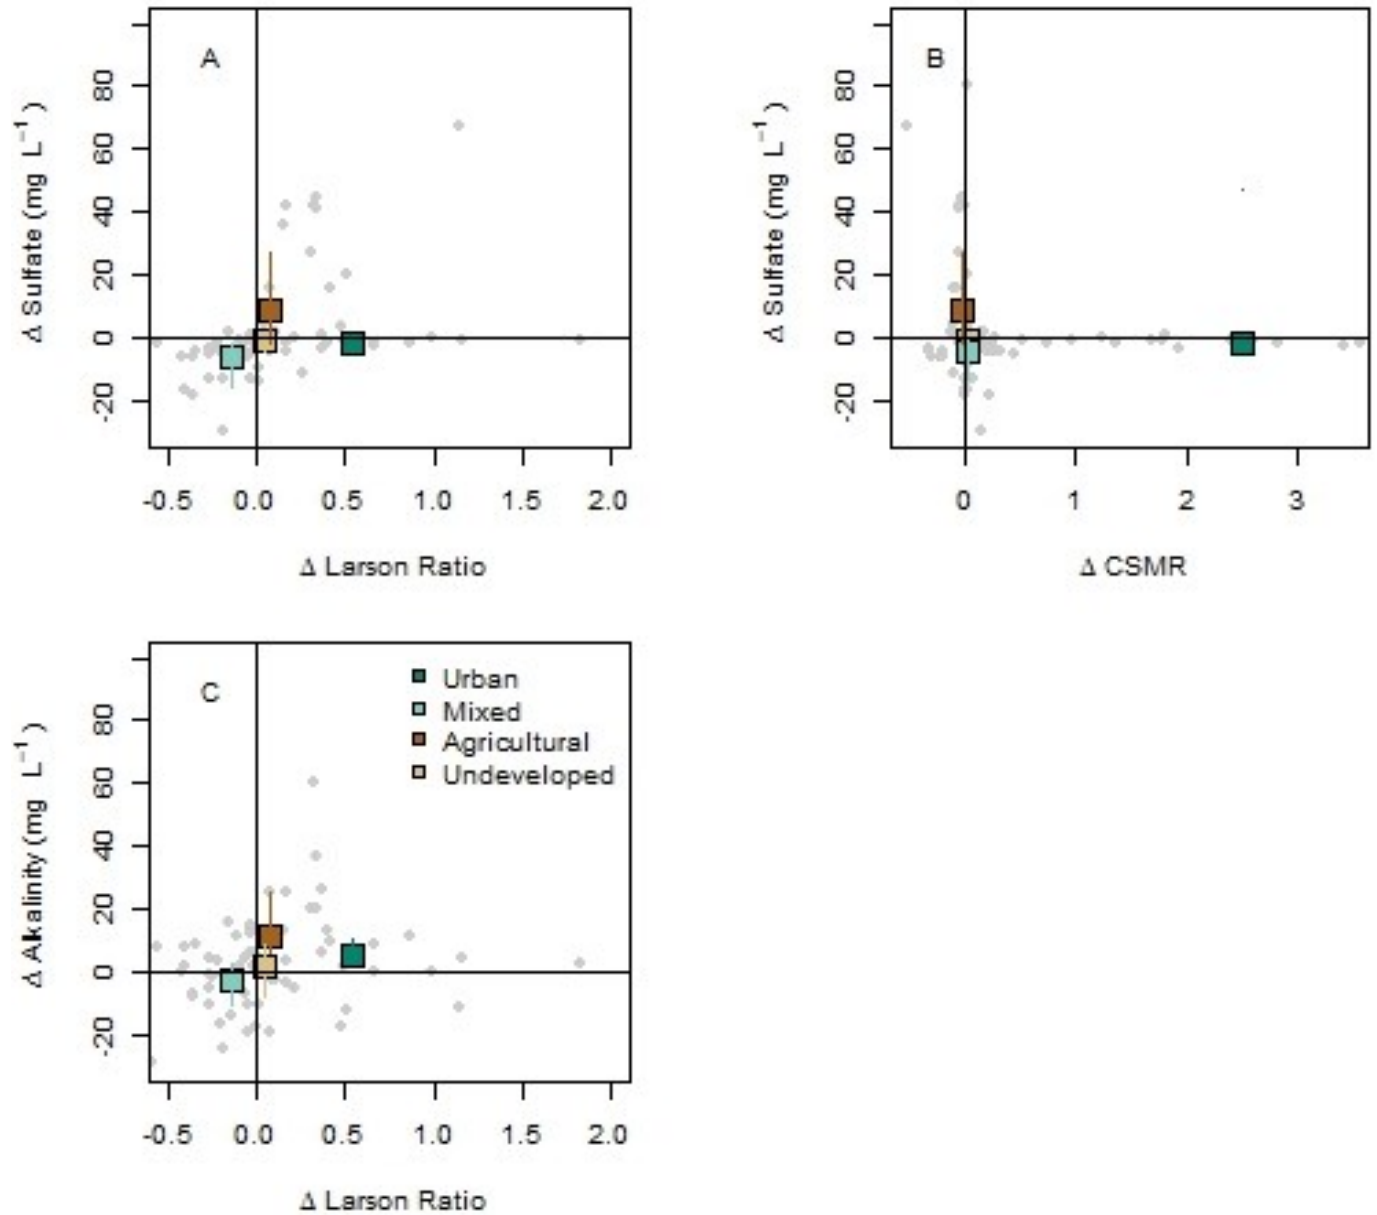

Figure S6. Plot of the number of reported Pb ALEs per 10 upstream surface drinking water intakes on the y-axis versus (A) chloride concentration (mg/L); and, (B) Larson ratio on the x-axis. Open circles show results for individual stations and the red line shows a locally-weighted regression (LOESS) smooth through the data points.

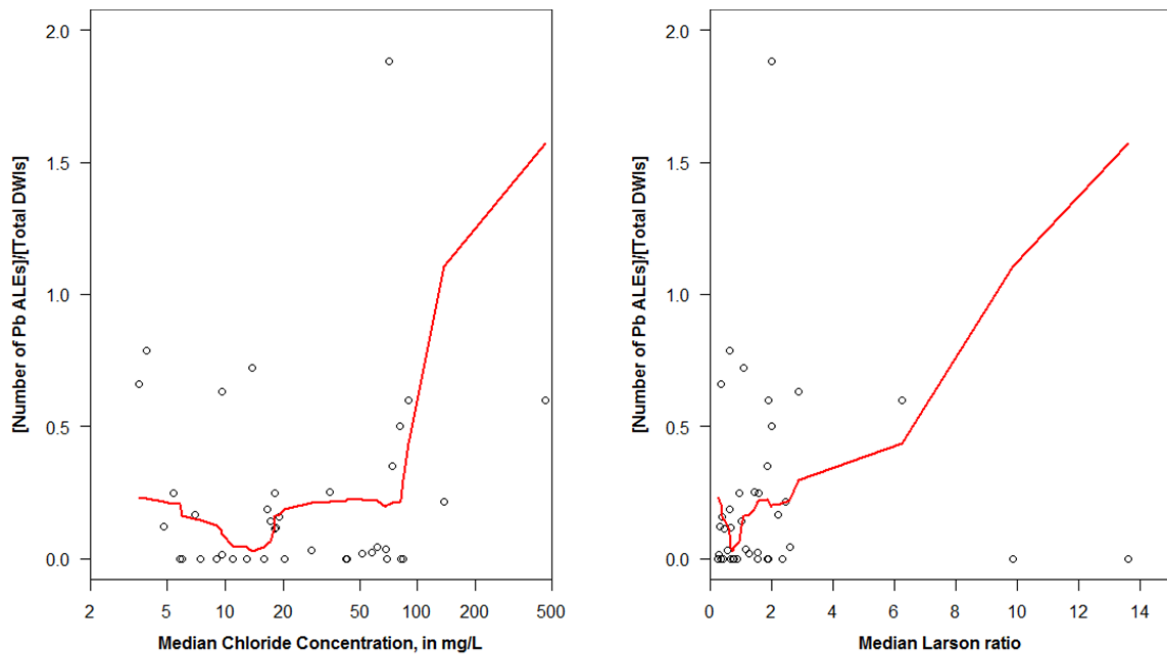

Supplement: NIHMS1531792-supplement-Sup4.pdf [file NIHMS1531792-supplement-Sup4.pdf]
